# Supplementary material for: Respiratory Syncytial Virus Matrix Protein-Chromatin Association Is Key to Transcriptional Inhibition in Infected Cells
Source: MDPI journal article supplement (doi:10.3390/cells10102786), 2021-10-18

## Supplementary Materials

**Supplementary Figure S1.** RSV M's ability to inhibit transcription *in vitro* is dependent on R170/K172. (A) Increasing amounts of purified His-Mwt or His-M-R170T/K172T protein were added to 3.5 ng DNA template (pGEM Express Positive Control Template, 96 pM) for 15 min at room temperature and then added to a cell-free T7 transcription assay (Riboprobe System T7 kit). Samples were incubated for 1 h at 37°C, run on a 1% agarose gel with ethidium bromide and imaged under UV illumination. (B) Levels of transcribed RNA from (A) were quantified using the NIH ImageJ software, and expressed as a percentage of the levels of transcript in the absence of M. The concentrations of the respective proteins inhibiting transcription by 50% ( $K_i$ ) estimated from the curves are indicated.

**Supplementary Figure S2.** R170/K172 residues are not critical for M nuclear export. Overnight cultures of Vero cells grown on coverslips were transfected to express GFP-Mwt or GFP-M-R170T/K170T using Lipofectamine 2000 (1:1 ratio of DNA to reagent). 18 h after transfection, cultures were treated either with or without leptomycin B (LMB). 20-24 h after transfection the localisation of GFP fusion proteins was assessed by quantitative live cell CLSM, with cells transfected to express GFP alone or GFP-Rev (positive control for LMB action) as controls (typical cell images shown above). Analysis for the extent of nuclear accumulation (Fn/c) was performed as previously [14, 45, 46]. Data represent the mean  $\pm$  SEM ( $n \geq 30$ ) and are representative of a series of 3 similar experiments. \*  $p < 0.05$ , \*\*\*  $p < 0.001$ .

**Supplementary Figure S3.** The R170/K172 residues are not critical for M RNA binding *in vitro*. Increasing concentrations of purified His-Mwt or His-M-R170T/K172T protein were

incubated with 200 ng RNA for 15 min at room temperature, and the protein-RNA complexes electrophoresed on an 0.8% agarose gel for 8 h at 4°C followed by staining with ethidium bromide. Levels of unshifted (unbound) RNA were quantified using the NIH ImageJ software, with results expressed as a percentage of the value in the absence of M protein. Association constants (K<sub>as</sub>) estimated from the curves are indicated.

**Supplementary Figure S4.** Recombinant RSV carrying arginine 170/lysine 172 mutations shows impaired virus replication. Vero cells were infected with wild type rA2 (white columns) or mutant (rA2-M:R170T/K172T; black columns) at an MOI of 1. Cells were harvested at the times indicated p.i. and total RNA isolated. RNA was used to determine virus RNA genome equivalents by RT-qPCR by extrapolation from a standard curve produced from results using a plasmid carrying the RSVA N gene cDNA. Results represent the mean + SEM (n = 3), from a series of 2 similar experiments. \* p < 0.05.

# Supplementary Figure S1

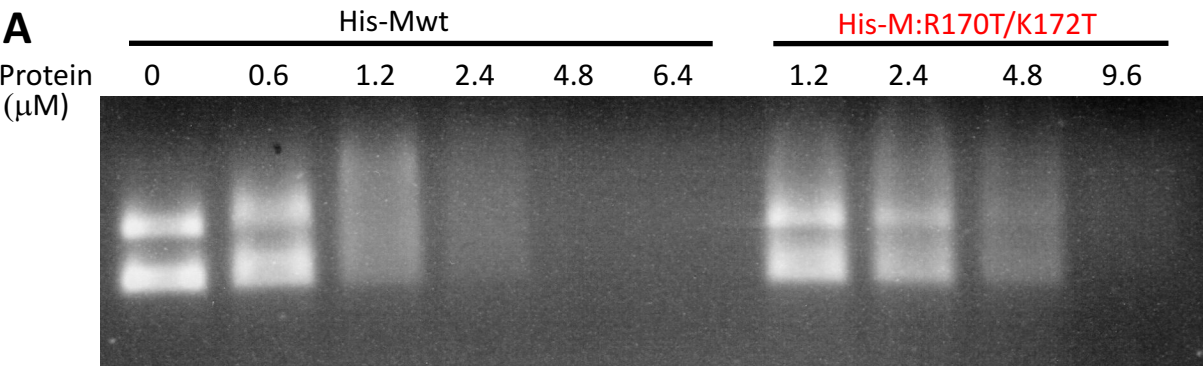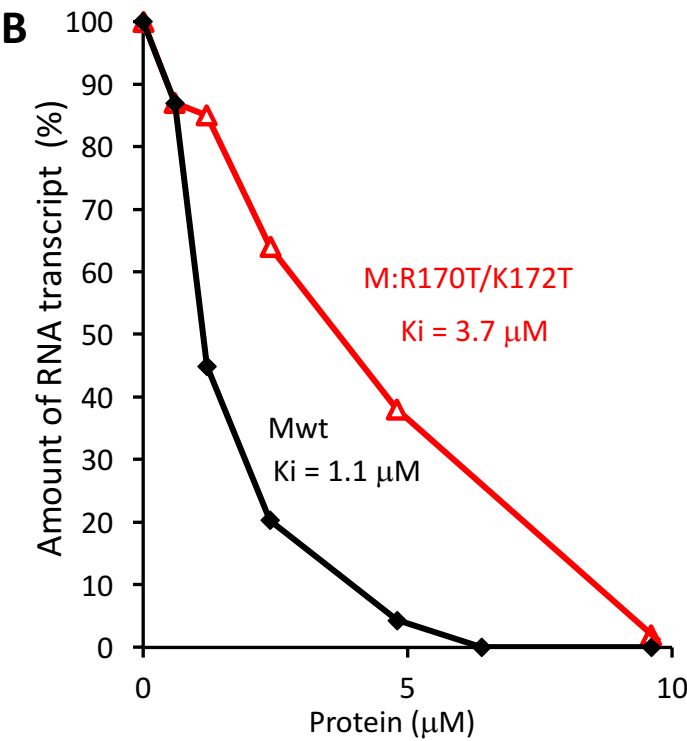

Supplementary Figure S2

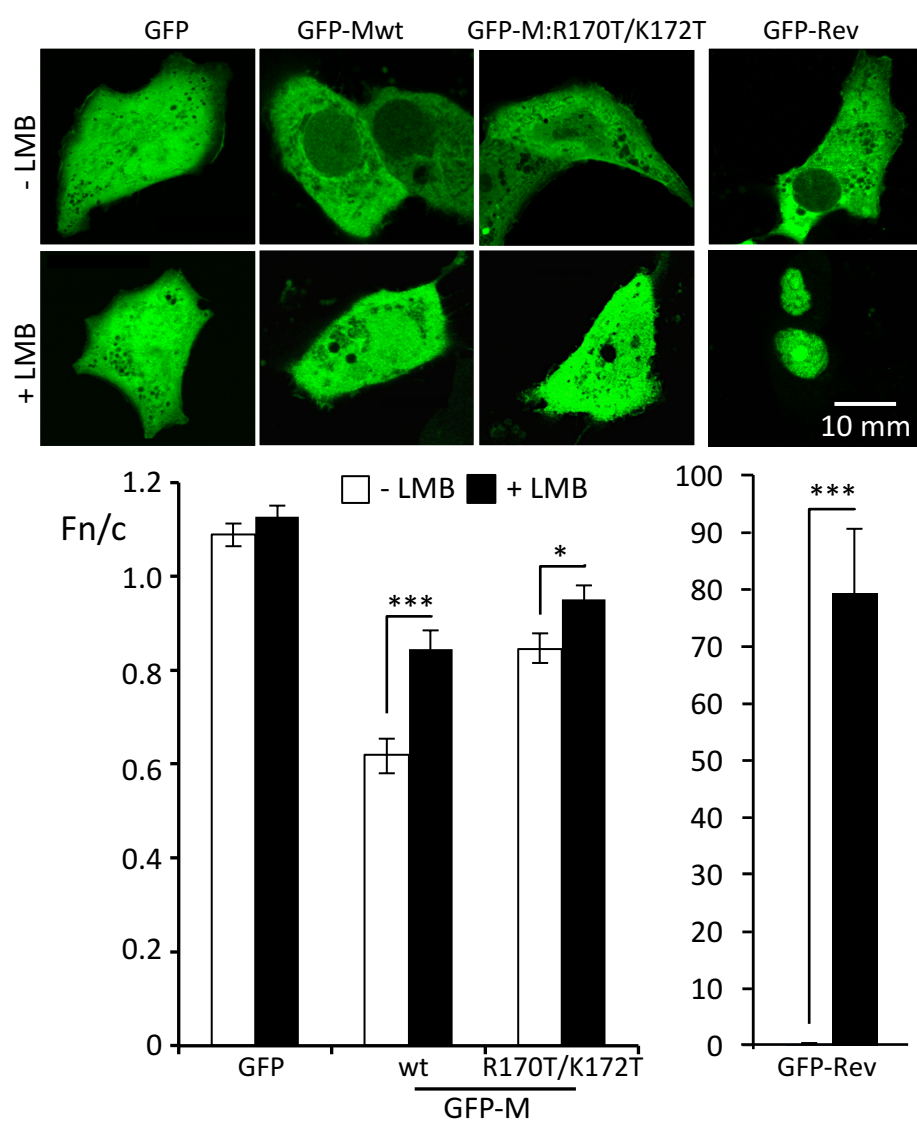

Supplementary Figure S3

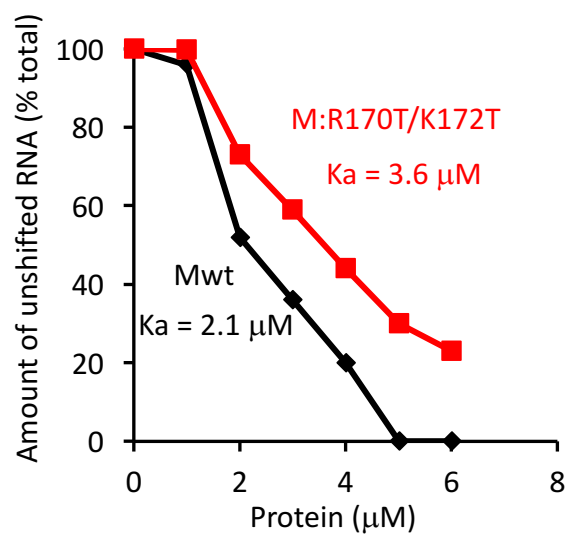

Supplementary Figure S4

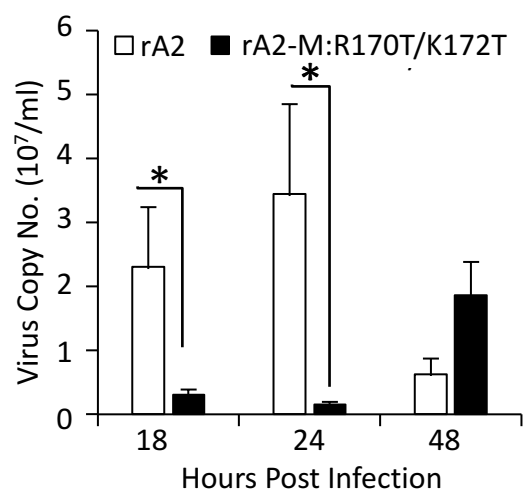

Supplement: s1 [file s1]
